# Supplementary material for: In vitro Chondrocyte Responses in Mg-doped Wollastonite/Hydrogel Composite Scaffolds for Osteochondral Interface Regeneration
Source: PubMed Central journal article supplement (PMC6297151; doi:10.1038/s41598-018-36200-x), 2018-12-17

# **In vitro Chondrocyte Responses in Mg-doped Wollastonite/Hydrogel Composite Scaffolds for Osteochondral Interface Regeneration**

**Xinning Yu<sup>1,2,4</sup>, Tengfei Zhao<sup>1,2</sup>, Yiyi Qi<sup>1,2</sup>, Jianyang Luo<sup>1,2</sup>, Jinghua Fang<sup>1,2,4</sup>, Xianyan Yang<sup>3</sup>, Xiaonan Liu<sup>1,2</sup>, Tengjing Xu<sup>1,2</sup>, Quanming Yang<sup>1,2</sup>, Zhongru Gou<sup>3</sup>, Xuesong Dai<sup>1,2\*</sup>**

<sup>1</sup>Department of Orthopaedic Surgery, Second Affiliated Hospital, School of Medicine, Zhejiang University, Hangzhou 310009, China.

<sup>2</sup>Orthopaedics Research Institute, Zhejiang University, Hangzhou, 310009, China.

<sup>3</sup>Bio-nanomaterials and Regenerative Medicine Research Division, Zhejiang-California International NanoSystems Institute, Zhejiang University, Hangzhou 310058, China.

<sup>4</sup>Department of Orthopaedic Surgery, Hangzhou Mingzhou Hospital, Hangzhou 311215, China.

Correspondence should be addressed to Xuesong Dai (E-mail: [daixshz@zju.edu.cn](mailto:daixshz@zju.edu.cn))

Figure S1

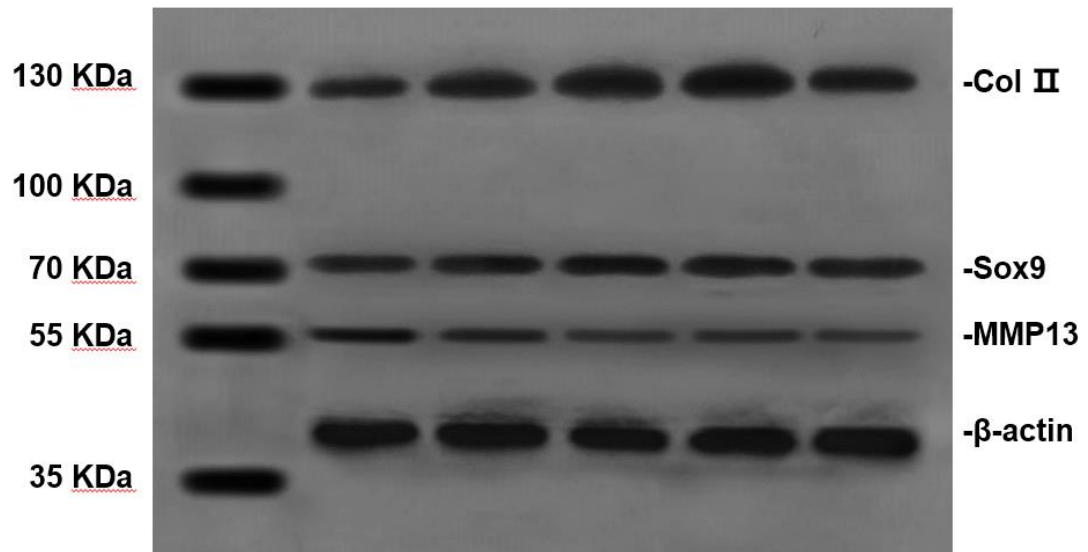

Figure S2

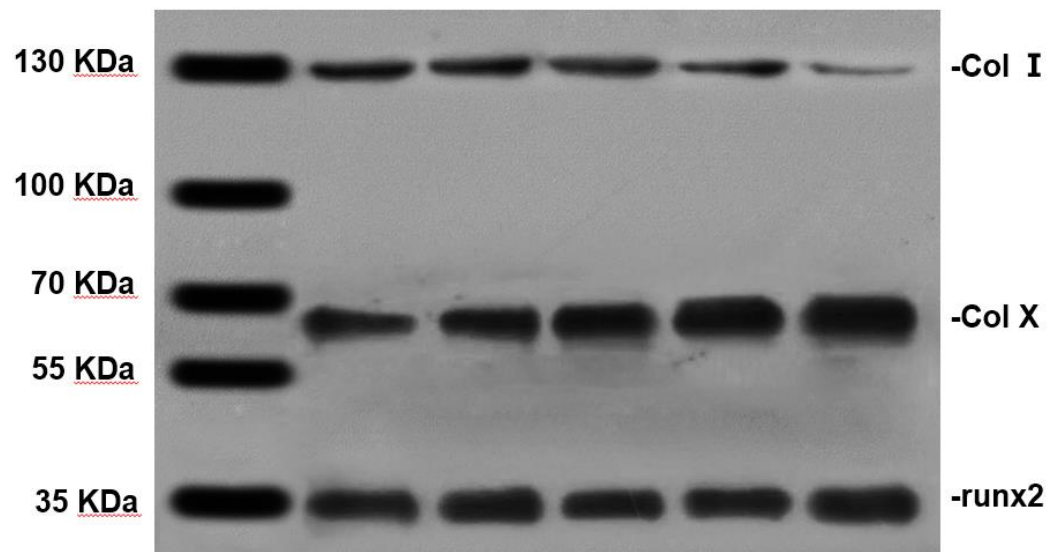

Figure S3

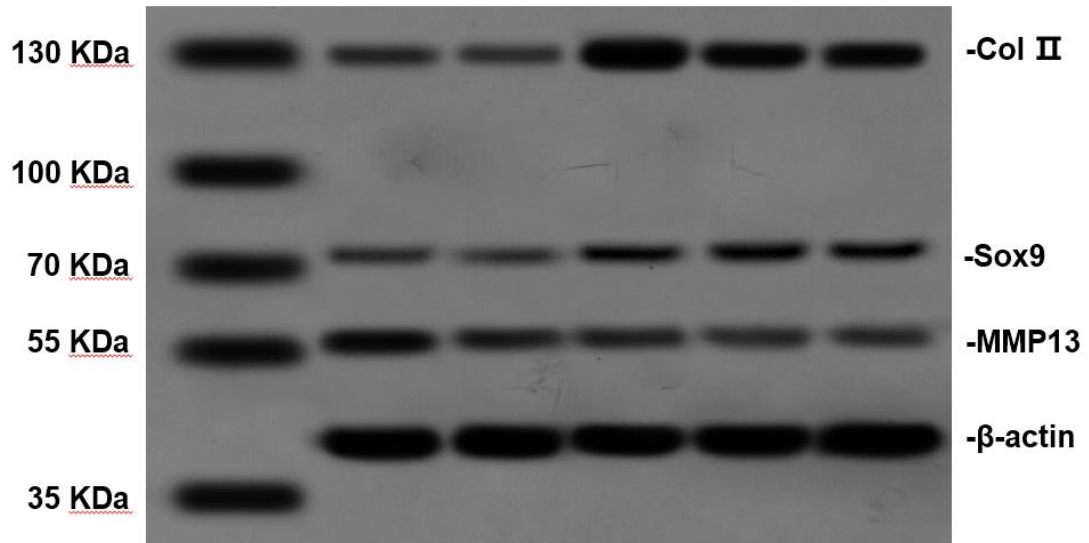

Figure S4

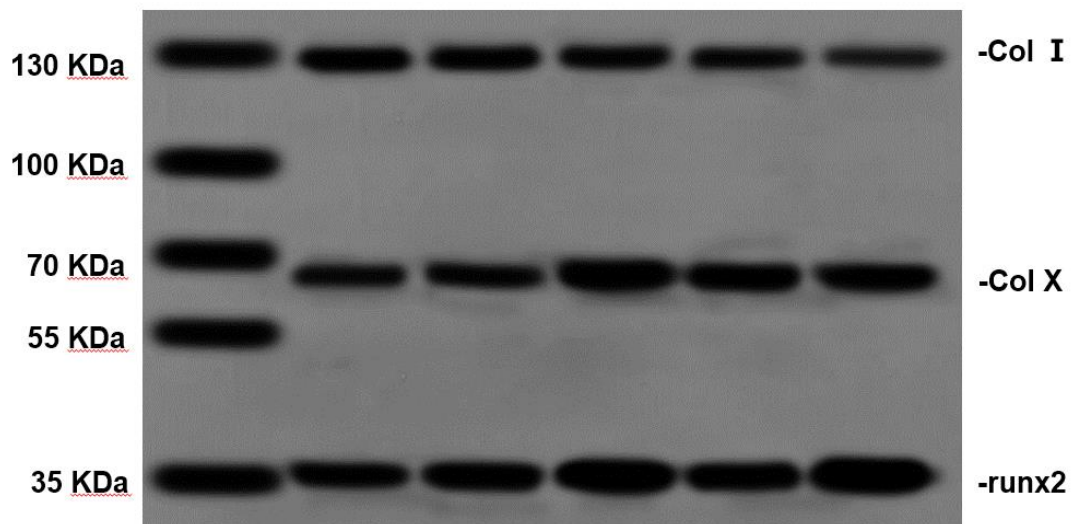

Figure S5

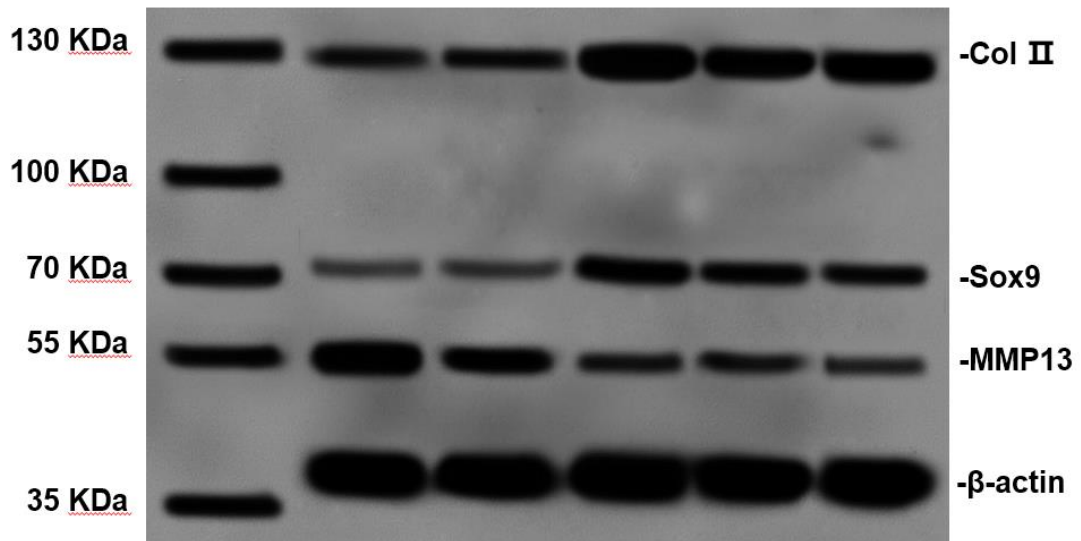

Figure S6

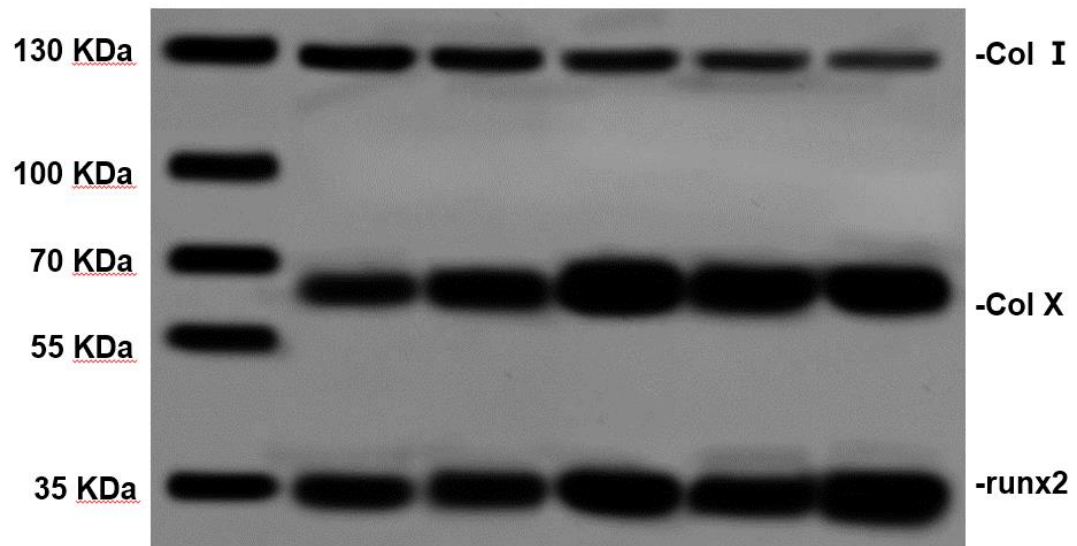

Supplement: 41598_2018_36200_MOESM1_ESM.pdf [file 41598_2018_36200_MOESM1_ESM.pdf]
